# Supplementary material for: Identification of 7-(4′-Cyanophenyl)indoline-1-benzenesulfonamide as a mitotic inhibitor to induce apoptotic cell death and inhibit autophagy in human colorectal cancer cells
Source: PubMed Central journal article supplement (PMC5622076; doi:10.1038/s41598-017-12795-5), 2017-09-29

**Identification of 7-(4'-Cyanophenyl)indoline-1-benzenesulfonamide as a mitotic inhibitor to induce apoptotic cell death and inhibit autophagy in human colorectal cancer cells**

**Tung-Yun Wu<sup>a</sup>, Ting-Yu Cho<sup>b</sup>, Chung-Kung Lu<sup>c</sup>,  
Jing-Ping Liou<sup>d</sup>, Mei-Chuan Chen<sup>a,b,\*</sup>**

**<sup>a</sup> Ph.D. program for the clinical drug discovery from botanical herbs, College of Pharmacy, Taipei Medical University, Taipei, Taiwan**

**<sup>b</sup>Graduate Institute of Pharmacognosy, College of Pharmacy, Taipei Medical University, Taipei, Taiwan.**

**<sup>c</sup>Chinese Medicinal Chemistry, National Research Institute of Chinese Medicine, Taipei, Taiwan**

**<sup>d</sup>School of Pharmacy, College of Pharmacy, Taipei Medical University, Taipei, Taiwan**

**\*Corresponding author:**

**Mei-Chuan Chen, Ph.D. program for the clinical drug discovery from botanical herbs, College of Pharmacy, Taipei Medical University, 250 Wuxing Street, Taipei 11031, Taiwan.**

**E-mail: mcchen1250@tmu.edu.tw**

**Supplementary Information**

Supplementary Fig. 1 Wu et al.

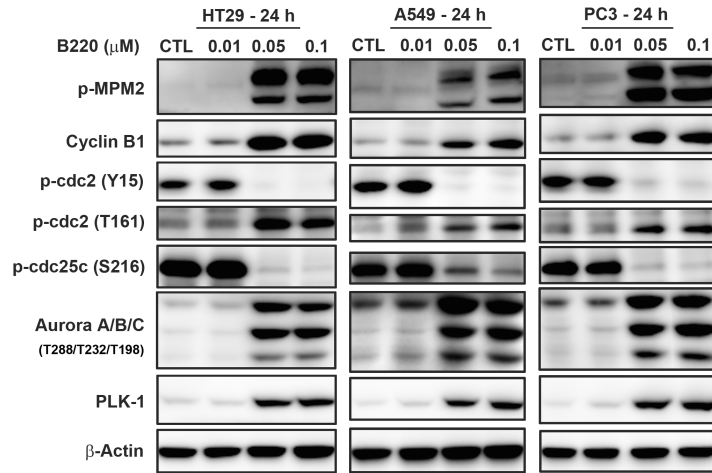

**Supplementary Fig. 1. B220 induces mitotic arrest in three different cancer cells.** Cells were treated with the indicated concentrations of B220 for 24 h, and cell lysates were immunoblotted using the indicated antibodies.

Supplementary Fig. 2 Wu et al.

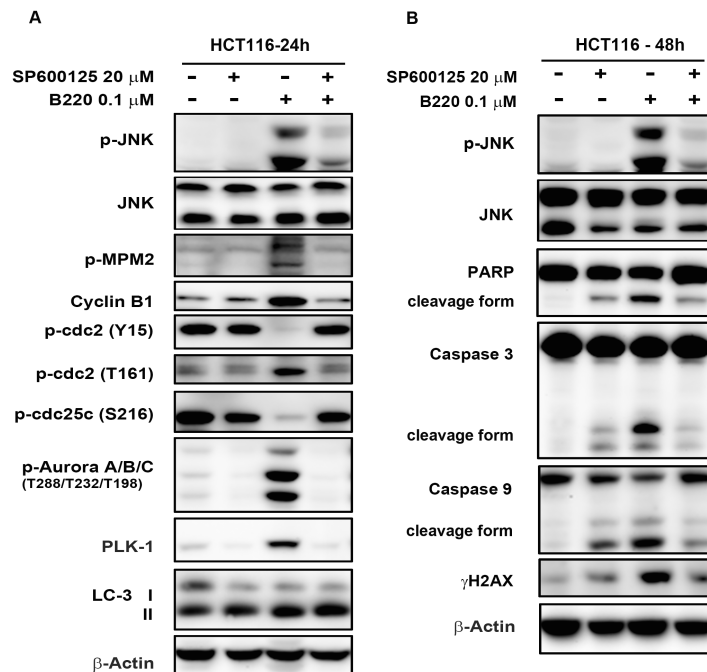

**Supplementary Fig. 2. B220 induces JNK-dependent G2/M cell cycle arrest and apoptosis in HCT116 cells.** Cells were treated with the indicated concentrations of B220 for indicated times, and cell lysates were immunoblotted using the indicated antibodies.

Supplementary Fig. 3 Wu et al.

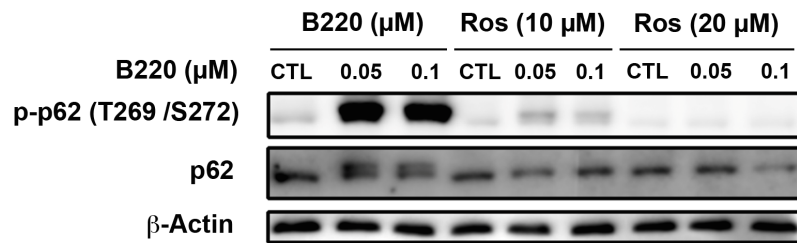

**Supplementary Fig. 3.** Effects of combined treatment with B220 and roscovitine (ROS) for 24 h in HCT 116 cells. Cells were treated with B220 in the presence or absence of roscovitine (ROS) for 24 h, and cell lysates were analyzed by Western blotting.

Supplementary Fig. 4 Wu et al.

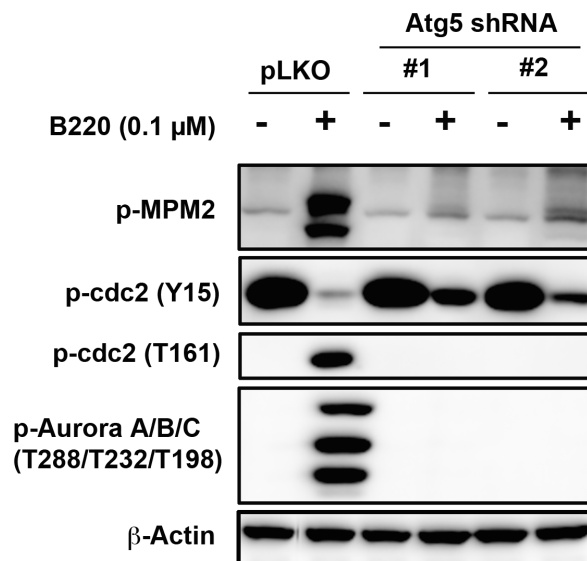

**Supplementary Fig. 4.** Knockdown of Atg5 reversed B220-induced expression of G2/M phase cell cycle arrest markers. Cells were treated with the indicated concentrations of B220 for 24 h, and cell lysates were analyzed by Western blotting.

**Identification of 7-(4'-Cyanophenyl)indoline-1-benzenesulfonamide as a mitotic inhibitor to induce apoptotic cell death and inhibit autophagy in human colorectal cancer cells**

**Tung-Yun Wu<sup>a</sup>, Ting-Yu Cho<sup>b</sup>, Chung-Kung Lu<sup>c</sup>,**

**Jing-Ping Liou<sup>d</sup>, Mei-Chuan Chen<sup>a,b,\*</sup>**

**<sup>a</sup> Ph.D. program for the clinical drug discovery from botanical herbs, College of Pharmacy, Taipei Medical University, Taipei, Taiwan**

**<sup>b</sup> Graduate Institute of Pharmacognosy, College of Pharmacy, Taipei Medical University, Taipei, Taiwan.**

**<sup>c</sup> Chinese Medicinal Chemistry, National Research Institute of Chinese Medicine, Taipei, Taiwan**

**<sup>d</sup> School of Pharmacy, College of Pharmacy, Taipei Medical University, Taipei, Taiwan**

**\*Corresponding author:**

**Mei-Chuan Chen, Ph.D. program for the clinical drug discovery from botanical herbs, College of Pharmacy, Taipei Medical University, 250 Wuxing Street, Taipei 11031, Taiwan.**

**E-mail: mcchen1250@tmu.edu.tw**

**Uncropped Figures**

Fig.2 Wu et al.

C

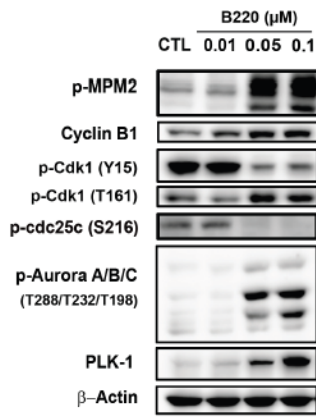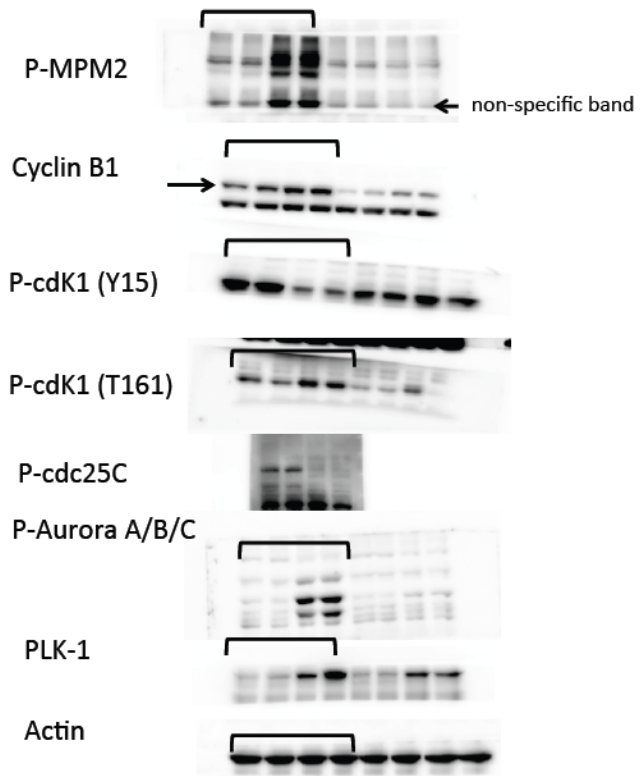

Fig.2 Wu et al.

D

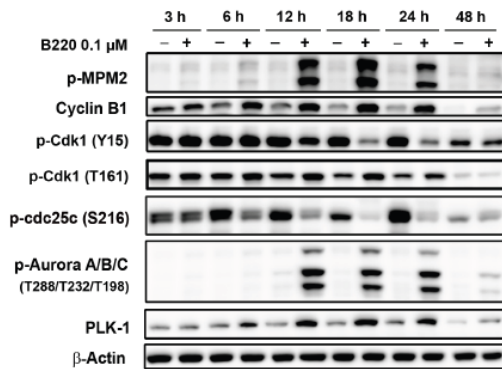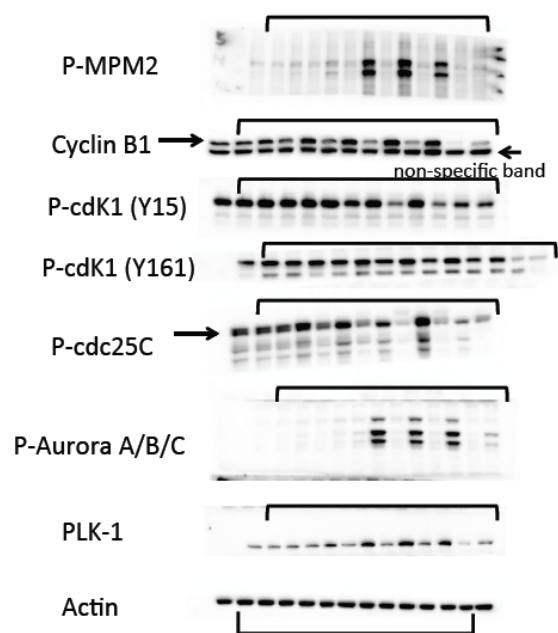

Fig. 3 Wu et al.

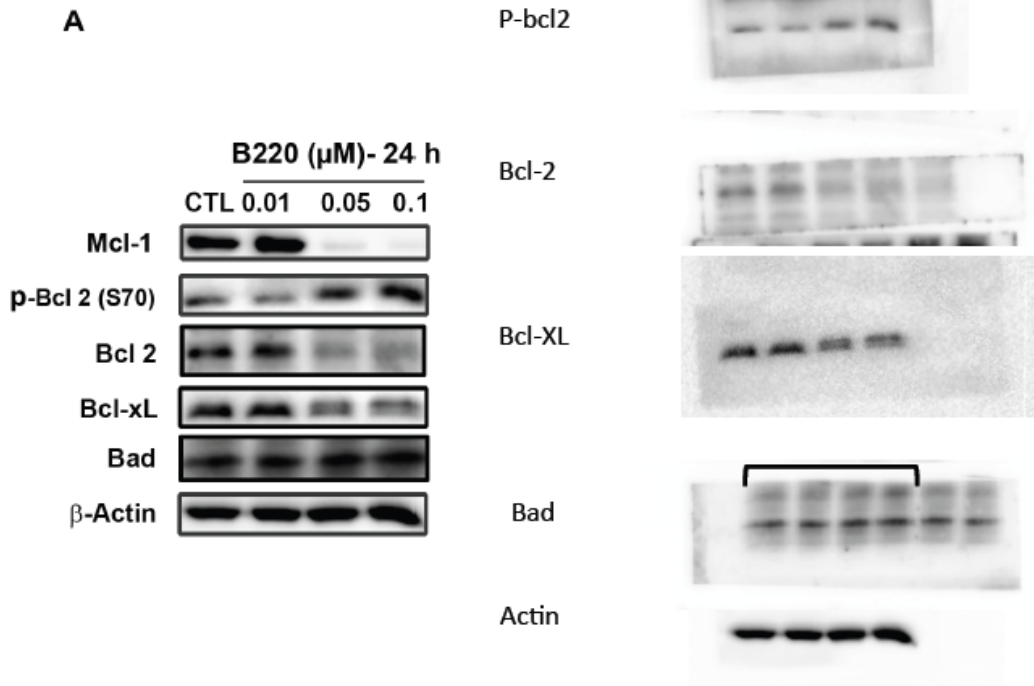

Fig. 3 Wu et al.

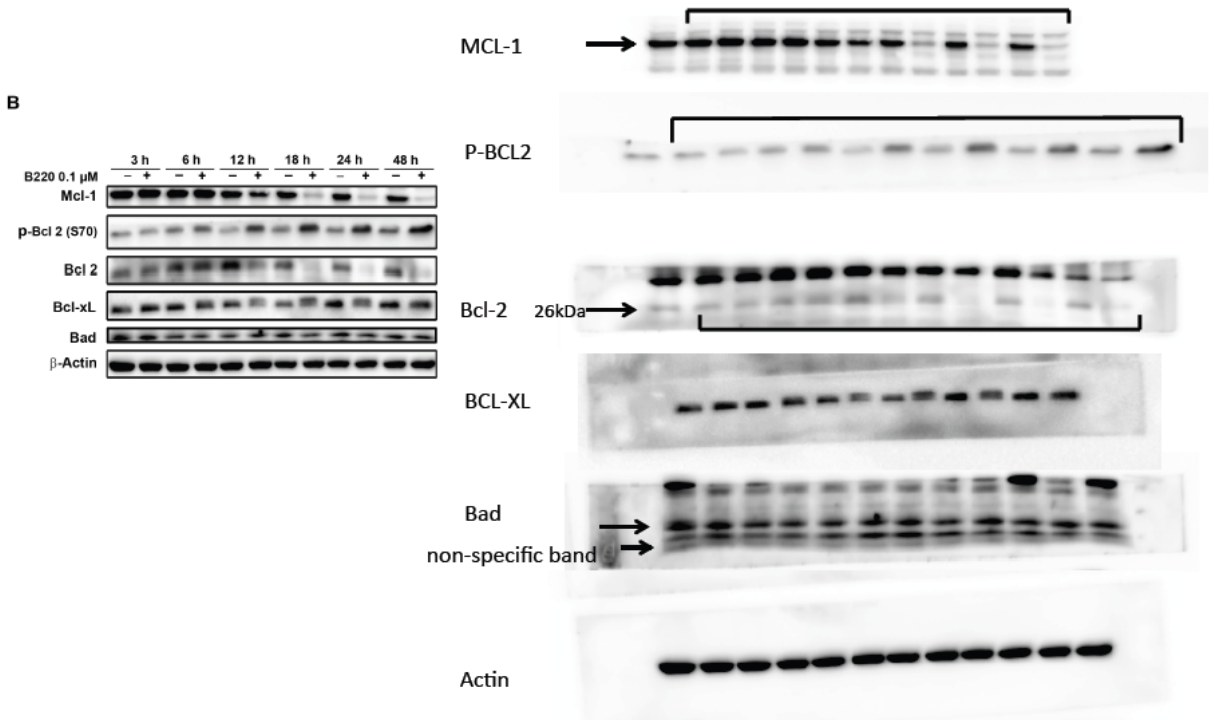

Fig. 3 Wu et al.

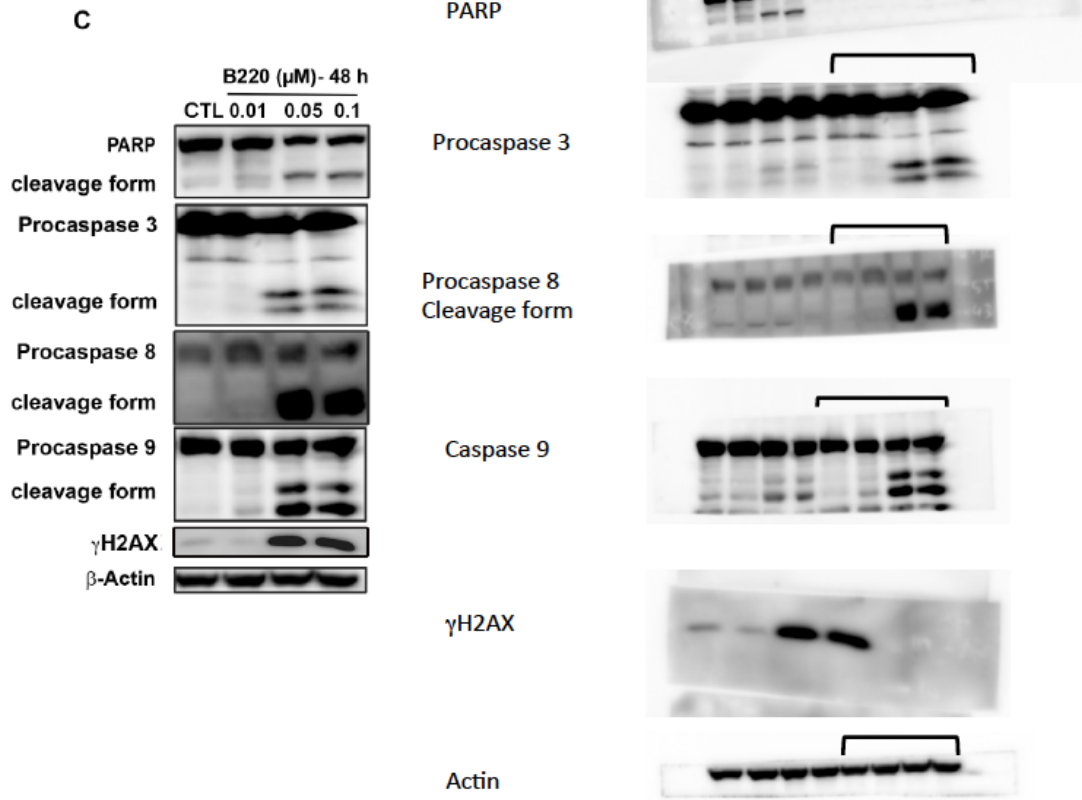

Fig. 3 Wu et al.

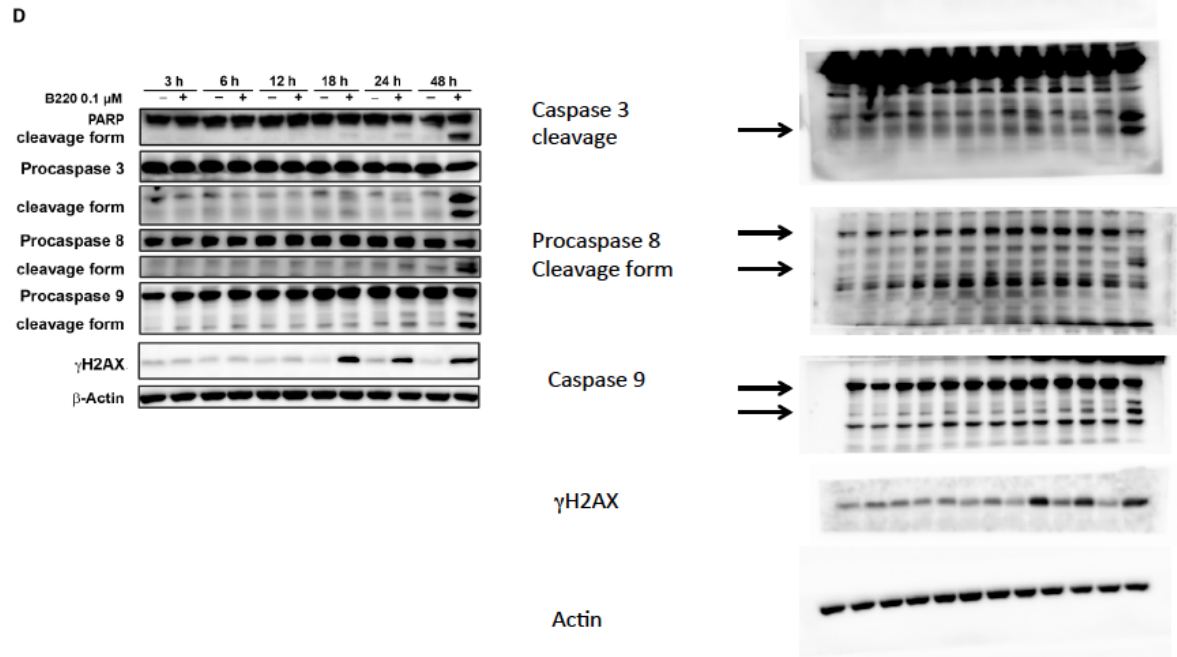

Fig. 4 Wu et al.

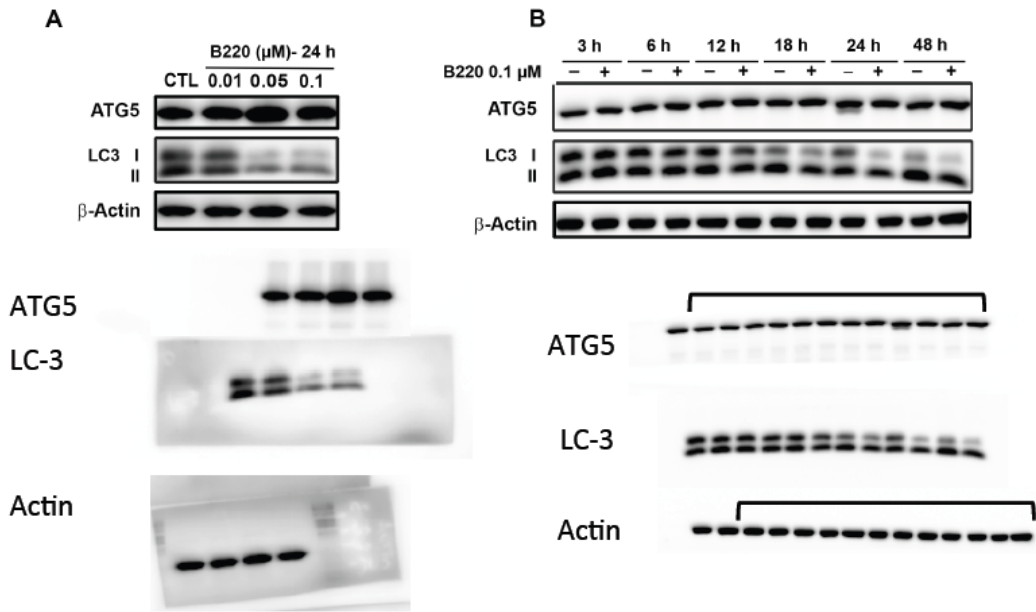

Fig. 4 Wu et al.

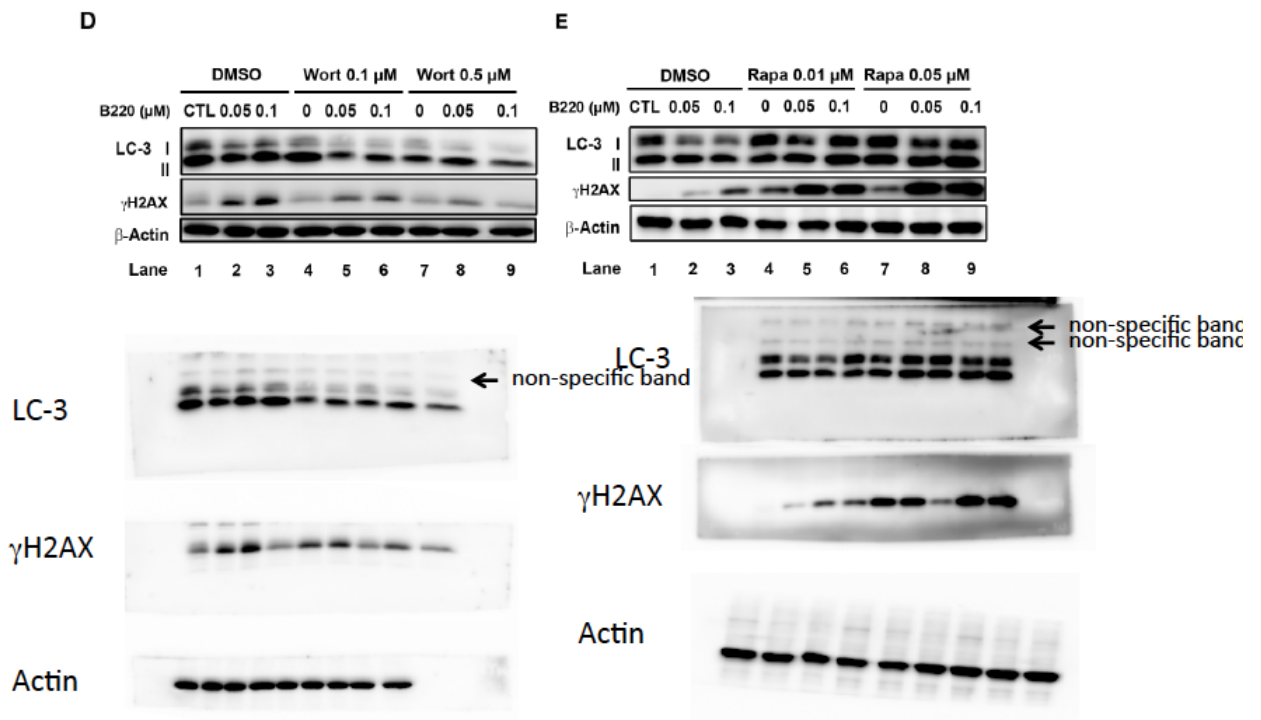



Fig. 5 Wu et al.

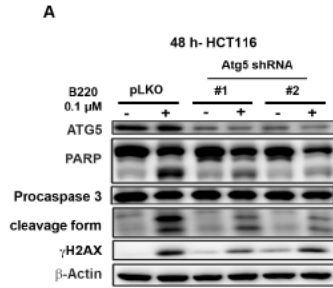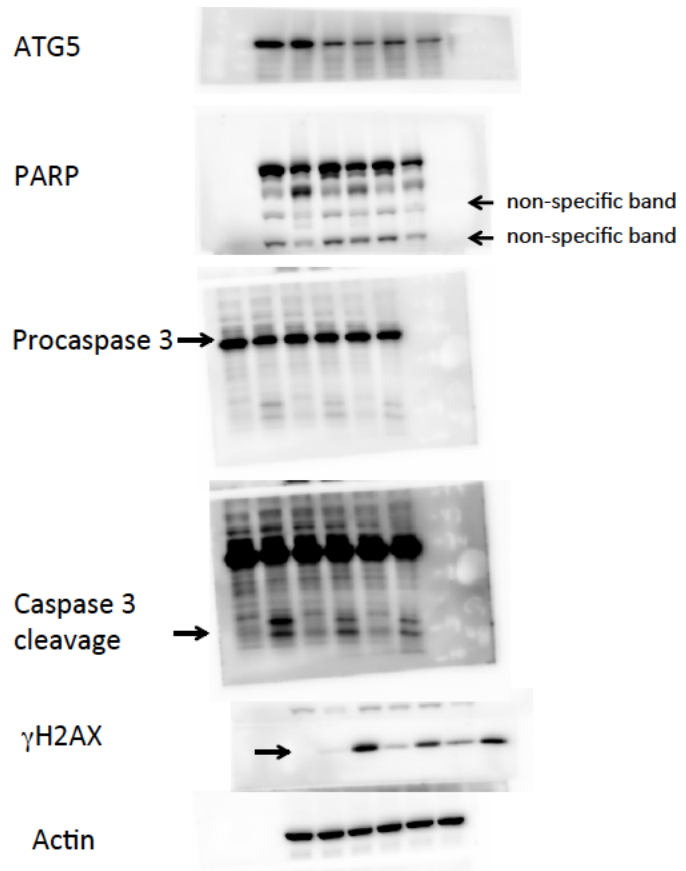

Fig. 5 Wu et al.

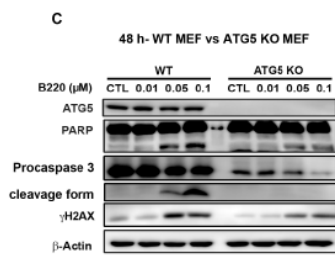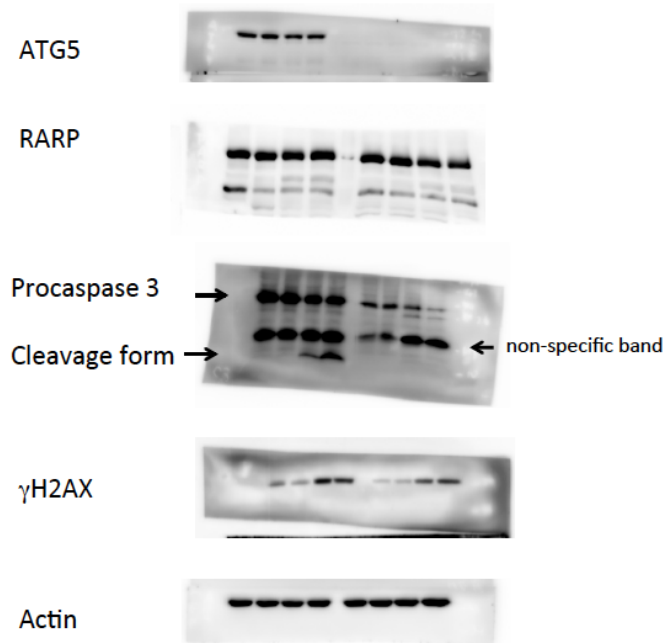

Fig. 6 Wu et al.

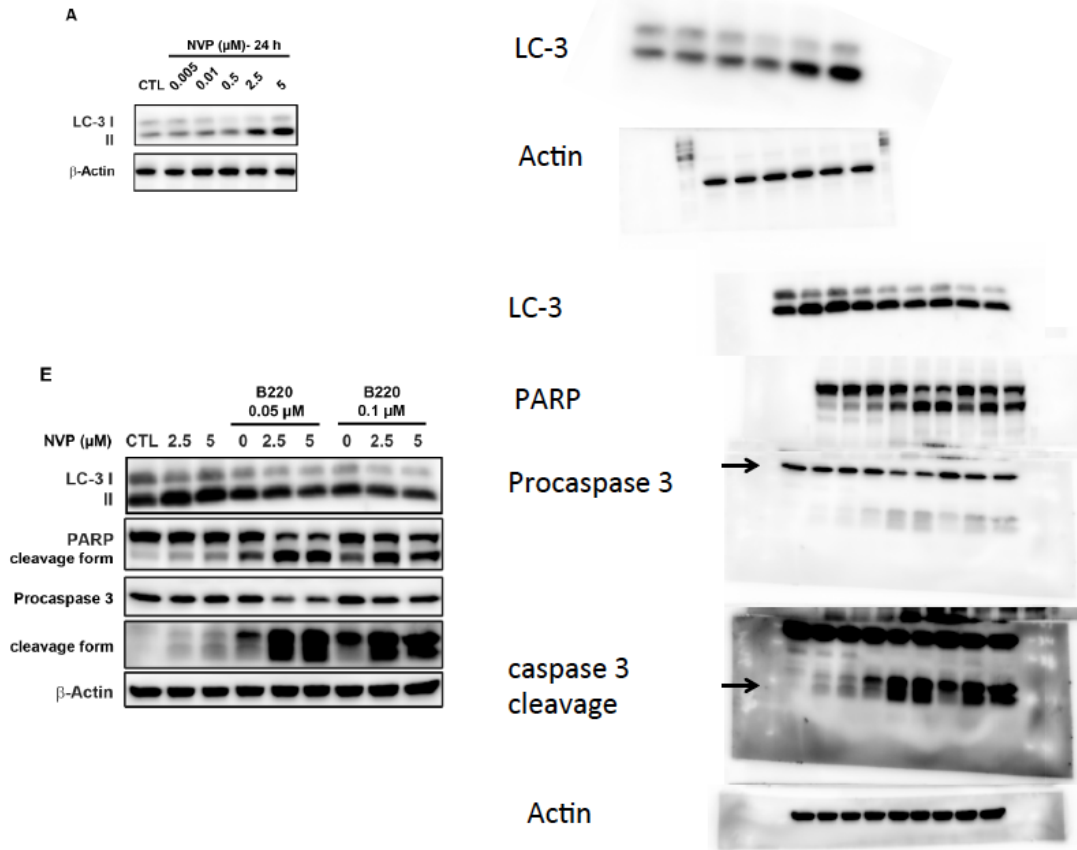

Supplementary Fig. 1 Wu et al.

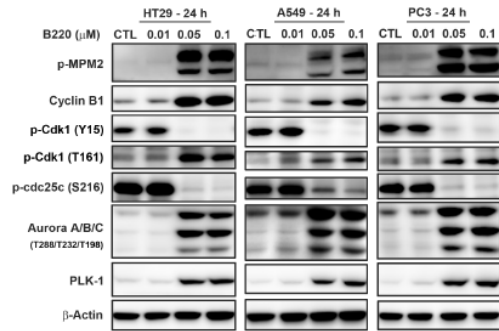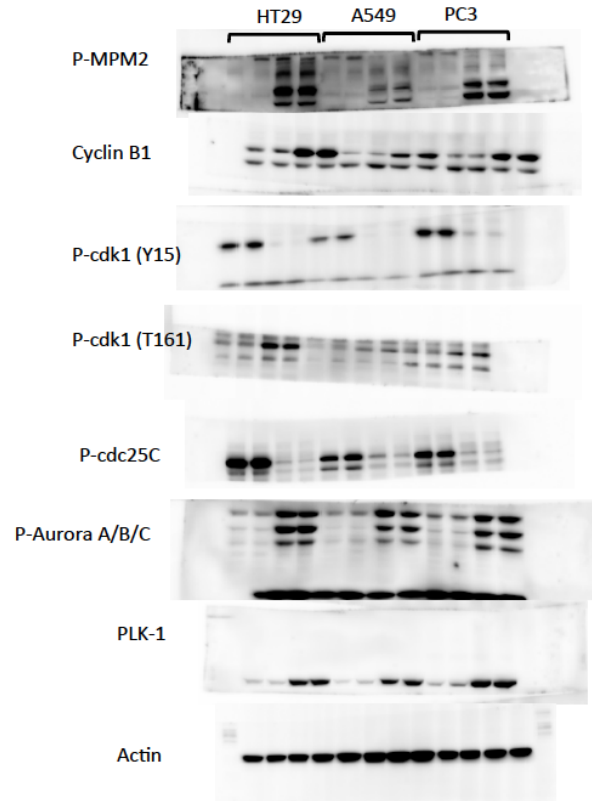

Supplementary Fig. 2 Wu et al.

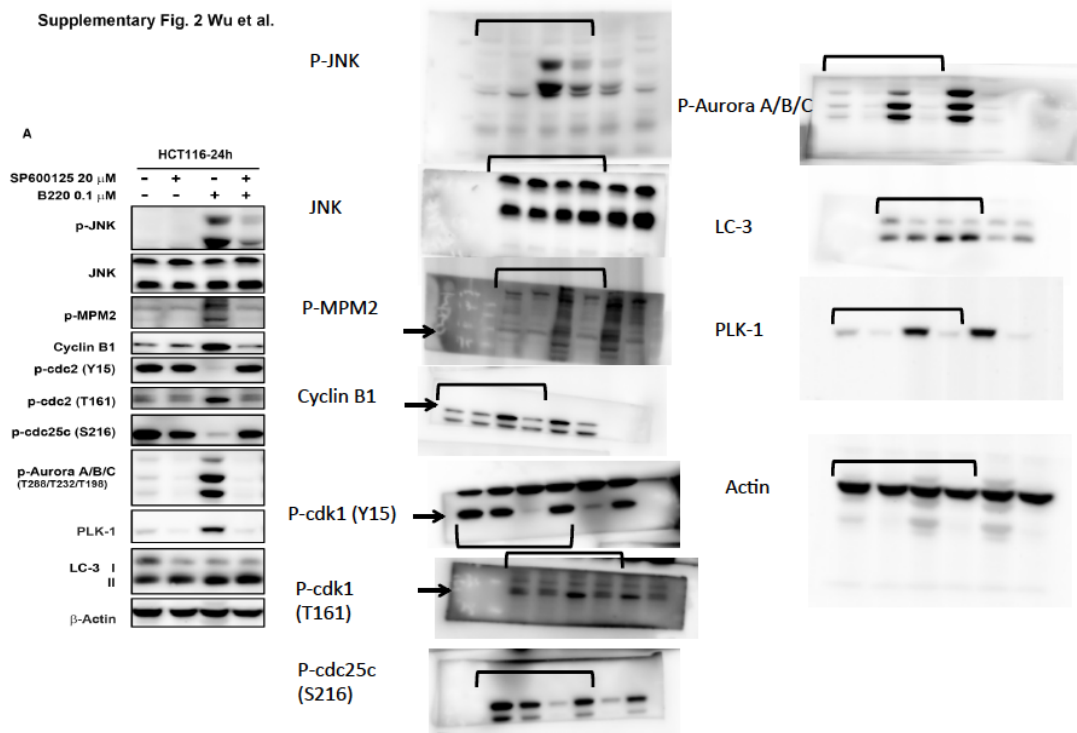

Supplementary Fig. 2 Wu et al.

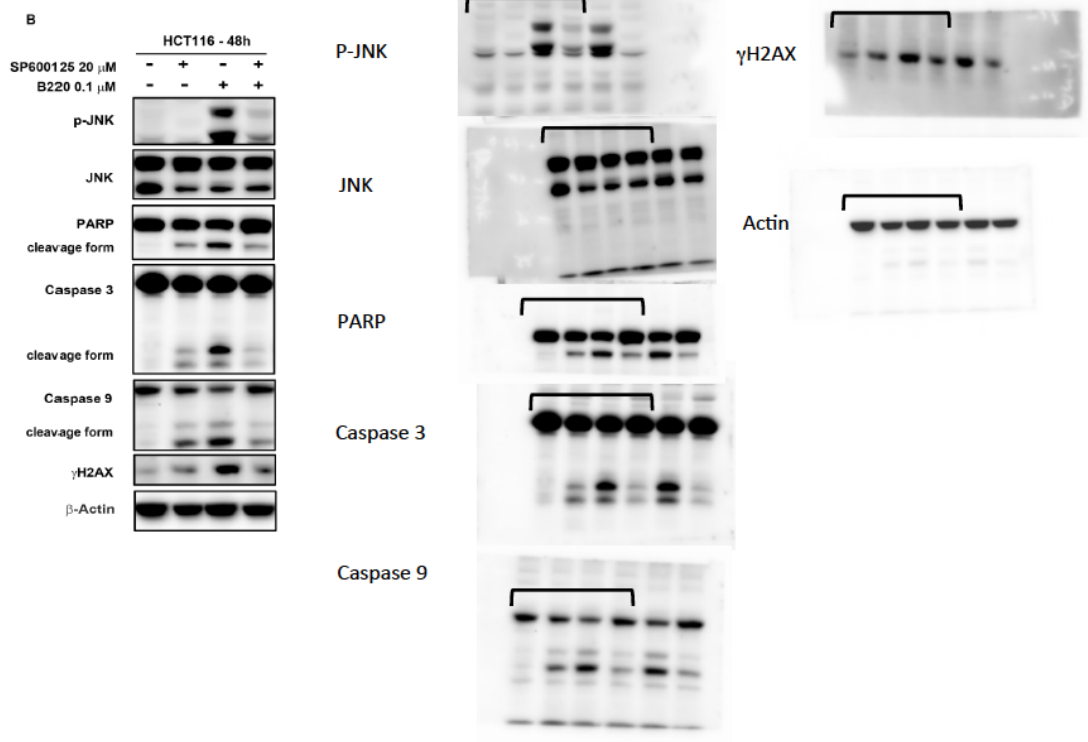

Supplementary Fig. 3 Wu et al.

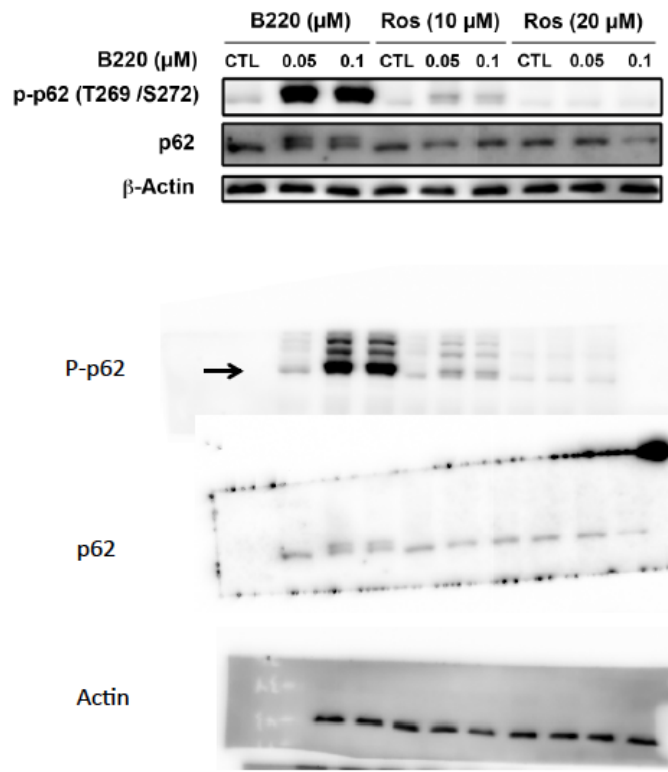

Supplementary Fig. 4 Wu et al.

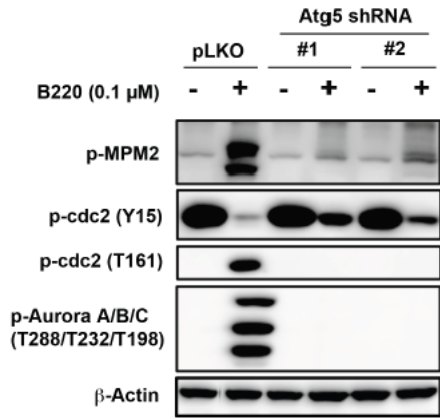

P-MPM2

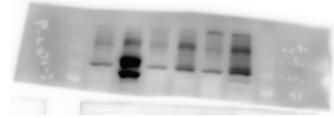

P-cdc2 (Y15)

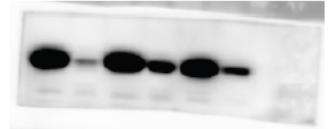

P-cdc2 (T161)

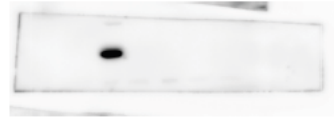

P-Aurora A/B/C

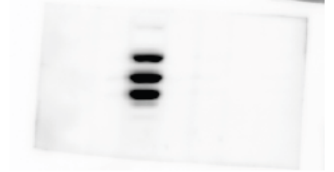

$\beta$ -Actin

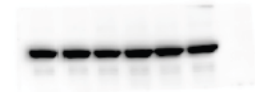

Supplement: 41598_2017_12795_MOESM1_ESM.pdf [file 41598_2017_12795_MOESM1_ESM.pdf]
